# Supplementary material for: Plastid phylogenomics of tribe Perseeae (Lauraceae) yields insights into the evolution of East Asian subtropical evergreen broad-leaved forests
Source: PubMed Central journal article supplement (PMC8756638; doi:10.1186/s12870-021-03413-8), 2022-01-13
Supplement: 12870_2021_3413_MOESM1_ESM.pdf [file 12870_2021_3413_MOESM1_ESM.pdf]

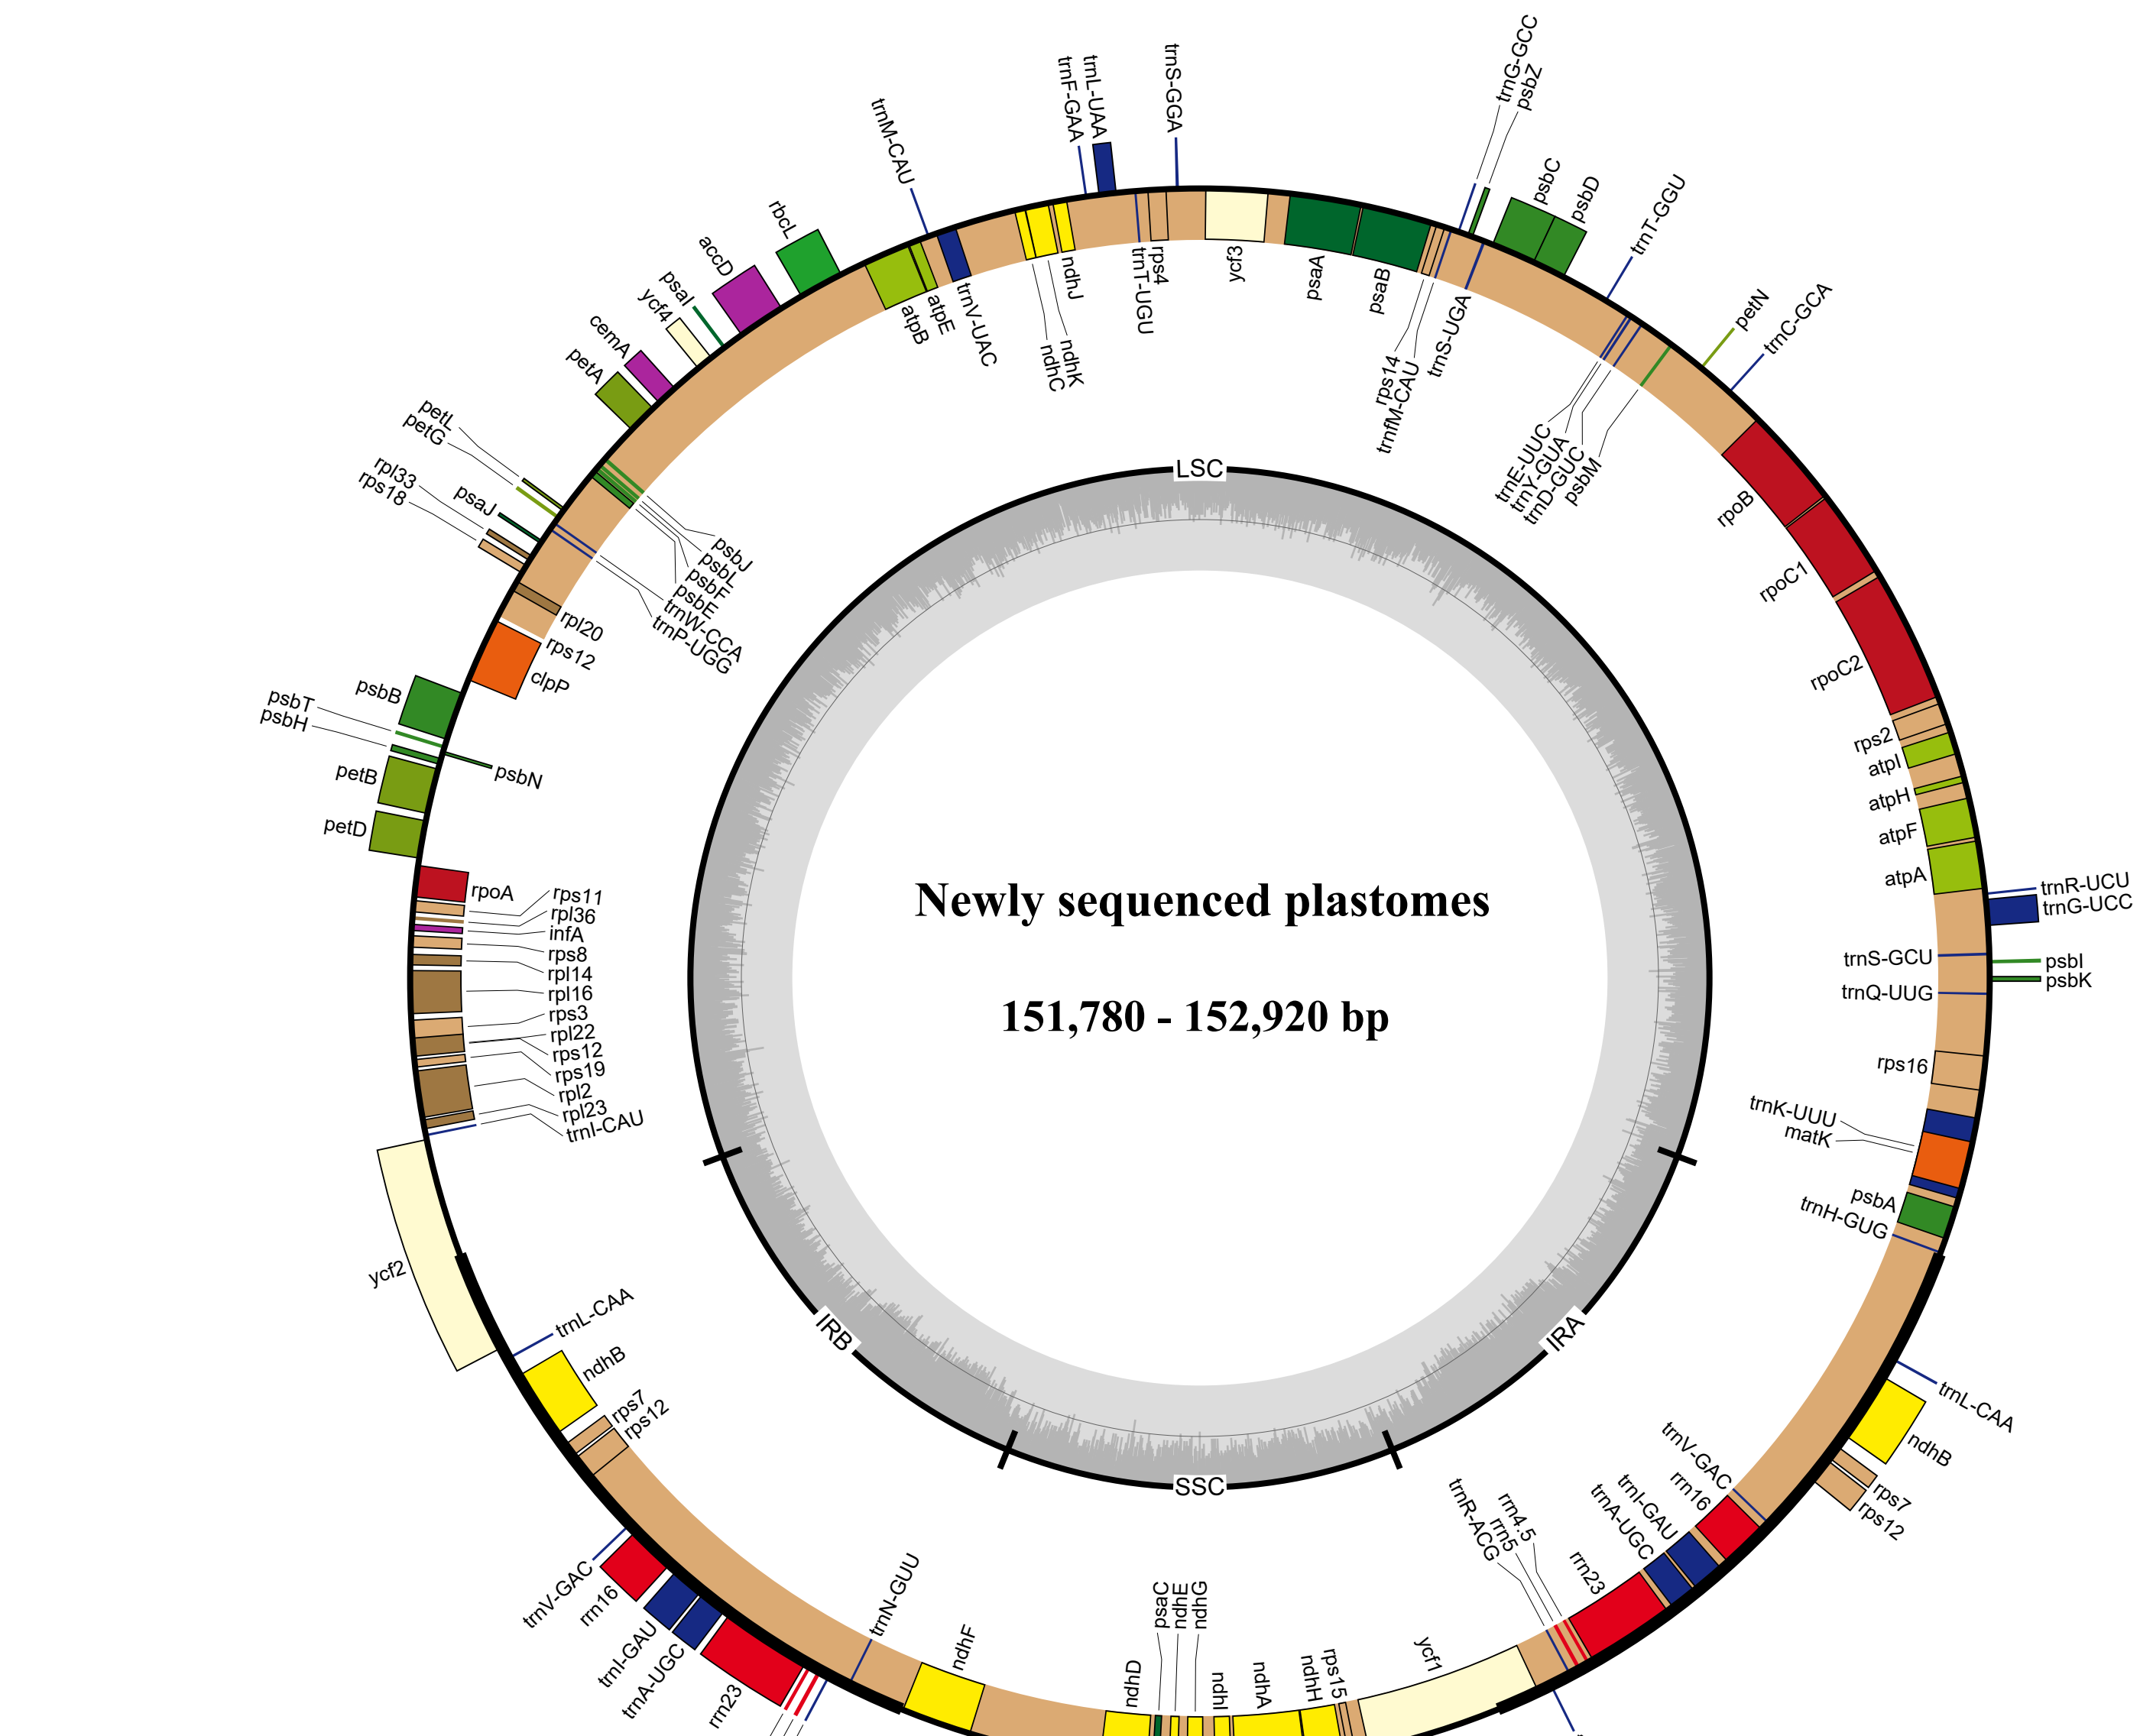

- photosystem I
- photosystem II
- cytochrome b/f complex
- ATP synthase
- NADH dehydrogenase
- RubisCO large subunit
- RNA polymerase
- ribosomal proteins (SSU)
- ribosomal proteins (LSU)
- clpP, matK
- other genes
- hypothetical chloroplast reading frames (ycf)
- transfer RNAs
- ribosomal RNAs
