# Supplementary material for: Plastid phylogenomics of tribe Perseeae (Lauraceae) yields insights into the evolution of East Asian subtropical evergreen broad-leaved forests
Source: PubMed Central journal article supplement (PMC8756638; doi:10.1186/s12870-021-03413-8), 2022-01-13

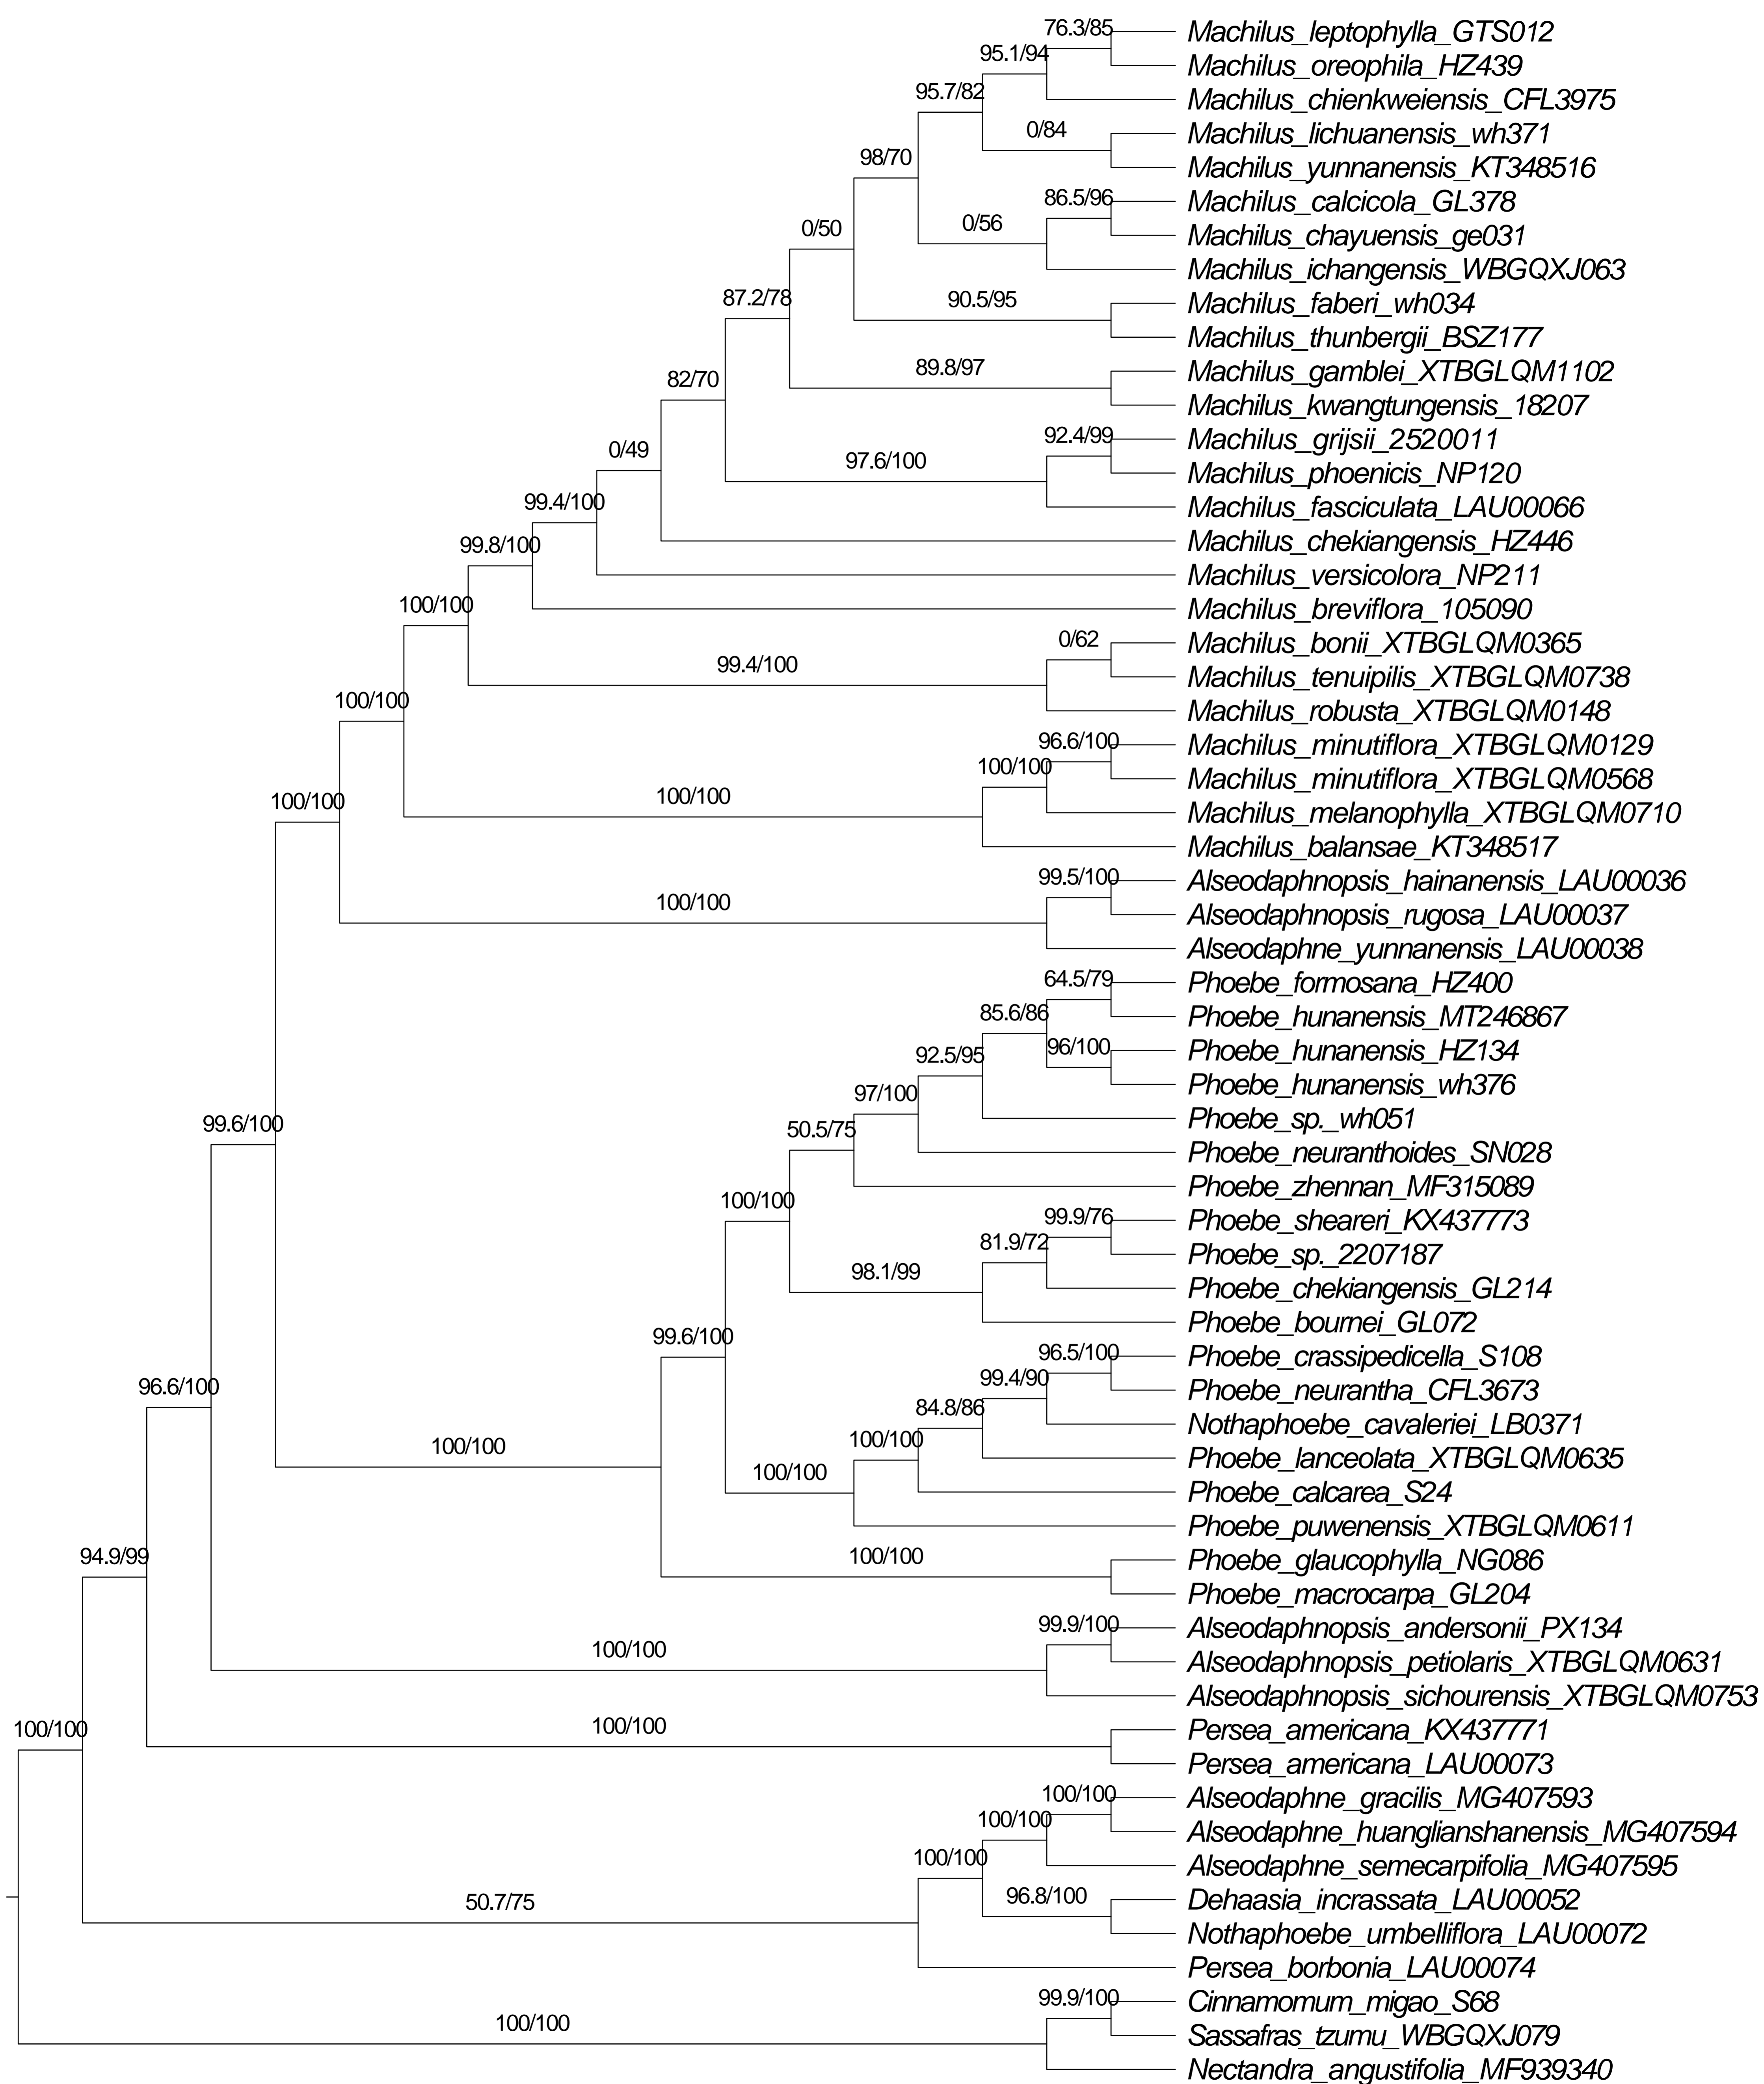

Supplement: 12870_2021_3413_MOESM6_ESM.pdf [file 12870_2021_3413_MOESM6_ESM.pdf]
